# Supplementary material
Source: PubMed Central journal article supplement (PMC3165660)
Supplement: supp_193_18_4933_v2_1.pdf [file supp_193_18_4933_v2_1.pdf]

**TABLE S1. Coding DNA bound by Rgg in the post-exponential phase of growth**

| Category & Spy49 no. <sup>a,b</sup> | Gene <sup>e</sup> | Description                                                         | ChIP-chip fold enrichment <sup>c</sup> | Transcript fold change ( <i>rgg</i> /wt) <sup>d,f</sup> |
|-------------------------------------|-------------------|---------------------------------------------------------------------|----------------------------------------|---------------------------------------------------------|
| <b>Virulence associated</b>         |                   |                                                                     |                                        |                                                         |
| 830                                 | <i>sclB</i>       | collagen like surface protein                                       | 2.66                                   | 3                                                       |
| 1084                                | <i>inlA</i>       | internalin                                                          | 2.30                                   | -                                                       |
| 146                                 | <i>slo</i>        | streptolysin O                                                      | 2.21                                   | 28                                                      |
| <b>Transcriptional regulator</b>    |                   |                                                                     |                                        |                                                         |
| 1153                                | (-)               | repressor protein                                                   | 2.90                                   | -                                                       |
| 122c                                | (-)               | LysR family regulatory protein                                      | 2.24                                   | -                                                       |
| <b>Transport</b>                    |                   |                                                                     |                                        |                                                         |
| 1402                                | <i>fhuB2</i>      | ferrichrome transport system permease protein                       | 4.11                                   | -                                                       |
| 1397                                | (-)               | permease component BL0695 of the <i>cbiOQ</i> -type ABC transporter | 3.0                                    | -                                                       |
| 974                                 | (-)               | lipoprotein                                                         | 2.66                                   | -                                                       |
| 1021                                | (-)               | ABC transporter                                                     | 2.54                                   | -                                                       |
| 1249                                | <i>comFA</i>      | comF operon protein 1                                               | 2.35                                   | -                                                       |
| 1729                                | (-)               | putative cationic amino acid transporter protein                    | 2.21                                   | 58                                                      |
| 1162                                | (-)               | amino acid ABC transporter                                          | 2.08                                   | -5                                                      |
| 1611                                | (-)               | PTS system, IIB component                                           | 2.07                                   | 3                                                       |
| <b>Synthesis</b>                    |                   |                                                                     |                                        |                                                         |
| 1064                                | <i>rsuA</i>       | 16S pseudouridylate synthase                                        | 2.54                                   | -                                                       |
| 1638                                | <i>prmA</i>       | ribosomal protein L11 methyltransferase                             | 2.52                                   | -                                                       |
| 1615                                | <i>def</i>        | peptide deformylase                                                 | 2.28                                   | -                                                       |
| 905                                 | <i>gyrA</i>       | DNA gyrase subunit A                                                | 2.05                                   | -                                                       |
| <b>Metabolism</b>                   |                   |                                                                     |                                        |                                                         |
| 234                                 | <i>plr</i>        | NAD-dependent glyceraldehyde-3-phosphate dehydrogenase              | 2.13                                   | -                                                       |
| 399                                 | <i>phoH</i>       | phosphate starvation-induced protein                                | 2.15                                   | -                                                       |
| <b>Repair</b>                       |                   |                                                                     |                                        |                                                         |

|                     |             |                                       |      |    |
|---------------------|-------------|---------------------------------------|------|----|
| 1439                | <i>recD</i> | exodeoxyribonuclease V<br>alpha chain | 3.99 | -  |
| <b>Hypothetical</b> |             |                                       |      |    |
| 1006                | (-)         | hypothetical protein                  | 3.54 | -  |
| 426                 | (-)         | hypothetical protein                  | 3.36 | -  |
| 1200                | (-)         | hypothetical protein                  | 3.27 | -  |
| 1048                | (-)         | hypothetical protein                  | 3.20 | -  |
| 410                 | (-)         | hypothetical protein                  | 3.12 | -  |
| 502                 | (-)         | hypothetical protein                  | 2.28 | -  |
| 202                 | (-)         | hypothetical protein                  | 2.28 | -3 |
| 117                 | (-)         | hypothetical protein                  | 2.05 | -  |
| 371                 | (-)         | hypothetical protein                  | 2.03 | -  |
| 400                 | (-)         | hypothetical protein                  | 2.02 | -  |

<sup>a</sup> Genes are categorized based on KEGG genome annotations.

<sup>b</sup> Spy49 numbers are the open reading frames based on the *S. pyogenes* strain NZ131 genome annotation [23].

<sup>c</sup> ChIP-chip fold enrichment was calculated as a ratio of signal intensity between the *rggmyc+* and *rgg-*.

<sup>d</sup> Fold change in the transcript level is from [16].

<sup>e</sup> Hyphen indicates unnamed gene.

<sup>f</sup> Hyphen indicates no changes in the transcript level was observed.
